# Supplementary material for: Gene-Specific DNA Methylation Association with Serum Levels of C-Reactive Protein in African Americans
Source: PubMed Central journal article supplement (PMC3747126; doi:10.1371/journal.pone.0073480), 2013-08-19
Supplement: pone.0073480.s001.pdf [file pone.0073480.s001.pdf]

Supplement Table 1. The summary of 257 significant DNA methylation sites associated with CRP levels

| no. | DNAm       | Gene     | Location* |           |        | Beta ( SE )    | P-value                  | Bonferroni              |  |
|-----|------------|----------|-----------|-----------|--------|----------------|--------------------------|-------------------------|--|
|     |            |          | Chr.      | (bp)      | Strand |                |                          | P-value                 |  |
| 1   | cg07073964 | KLK10    | 19        | 649371    | -      | -4.12 ( 0.58 ) | 5.85 x 10 <sup>-12</sup> | 1.34 x 10 <sup>-7</sup> |  |
| 2   | cg09358725 | LMO2     | 11        | 33870664  | -      | -3.60 ( 0.52 ) | 1.69 x 10 <sup>-11</sup> | 3.88 x 10 <sup>-7</sup> |  |
| 3   | cg04121771 | TM4SF4   | 3         | 150674314 | +      | -4.42 ( 0.68 ) | 2.05 x 10 <sup>-10</sup> | 4.70 x 10 <sup>-6</sup> |  |
| 4   | cg08458487 | SFTPD    | 10        | 81699171  | -      | -2.79 ( 0.43 ) | 2.26 x 10 <sup>-10</sup> | 5.19 x 10 <sup>-6</sup> |  |
| 5   | cg09305224 | FUT7     | 9         | 139047066 | -      | -3.38 ( 0.52 ) | 2.48 x 10 <sup>-10</sup> | 5.67 x 10 <sup>-6</sup> |  |
| 6   | cg00645579 | IRF7     | 11        | 607140    | -      | -3.80 ( 0.59 ) | 2.94 x 10 <sup>-10</sup> | 6.75 x 10 <sup>-6</sup> |  |
| 7   | cg05556717 | CCL26    | 7         | 75257240  | -      | -3.32 ( 0.52 ) | 3.94 x 10 <sup>-10</sup> | 9.04 x 10 <sup>-6</sup> |  |
| 8   | cg17496921 | TSPAN16  | 19        | 11267993  | +      | -2.94 ( 0.46 ) | 4.97 x 10 <sup>-10</sup> | 1.14 x 10 <sup>-5</sup> |  |
| 9   | cg03801286 | KCNE1    | 21        | 34806378  | -      | -2.62 ( 0.41 ) | 5.61 x 10 <sup>-10</sup> | 1.29 x 10 <sup>-5</sup> |  |
| 10  | cg21969640 | GPR84    | 12        | 53043844  | -      | -3.08 ( 0.49 ) | 6.03 x 10 <sup>-10</sup> | 1.38 x 10 <sup>-5</sup> |  |
| 11  | cg05501357 | HIPK3    | 11        | 33264845  | +      | -3.35 ( 0.53 ) | 6.29 x 10 <sup>-10</sup> | 1.44 x 10 <sup>-5</sup> |  |
| 12  | cg03600318 | SFTPD    | 10        | 81698971  | -      | -3.58 ( 0.57 ) | 7.01 x 10 <sup>-10</sup> | 1.61 x 10 <sup>-5</sup> |  |
| 13  | cg18084554 | ARID3A   | 19        | 880046    | +      | -2.68 ( 0.43 ) | 7.91 x 10 <sup>-10</sup> | 1.81 x 10 <sup>-5</sup> |  |
| 14  | cg06625767 | F12      | 5         | 176769301 | -      | -2.80 ( 0.45 ) | 1.04 x 10 <sup>-9</sup>  | 2.39 x 10 <sup>-5</sup> |  |
| 15  | cg15248035 | CCIN     | 9         | 36159949  | +      | -2.62 ( 0.42 ) | 1.22 x 10 <sup>-9</sup>  | 2.79 x 10 <sup>-5</sup> |  |
| 16  | cg05546038 | NOL3     | 16        | 65764534  | +      | -3.96 ( 0.64 ) | 1.40 x 10 <sup>-9</sup>  | 3.21 x 10 <sup>-5</sup> |  |
| 17  | cg09303642 | NFE2     | 12        | 52977085  | -      | -2.70 ( 0.44 ) | 1.60 x 10 <sup>-9</sup>  | 3.68 x 10 <sup>-5</sup> |  |
| 18  | cg03330678 | SEPT9    | 17        | 72827828  | +      | -2.62 ( 0.43 ) | 1.69 x 10 <sup>-9</sup>  | 3.88 x 10 <sup>-5</sup> |  |
| 19  | cg17753124 | IER2     | 19        | 13120872  | +      | -3.34 ( 0.54 ) | 1.72 x 10 <sup>-9</sup>  | 3.94 x 10 <sup>-5</sup> |  |
| 20  | cg22242539 | SERPINF1 | 17        | 1611970   | +      | -3.25 ( 0.53 ) | 2.08 x 10 <sup>-9</sup>  | 4.76 x 10 <sup>-5</sup> |  |
| 21  | cg17166812 | NDUFS2   | 1         | 159436198 | +      | -3.89 ( 0.64 ) | 2.28 x 10 <sup>-9</sup>  | 5.24 x 10 <sup>-5</sup> |  |
| 22  | cg22266967 | S100P    | 4         | 6746599   | +      | -2.84 ( 0.47 ) | 2.29 x 10 <sup>-9</sup>  | 5.25 x 10 <sup>-5</sup> |  |
| 23  | cg12380764 | IL19     | 1         | 205037818 | +      | -2.93 ( 0.48 ) | 2.35 x 10 <sup>-9</sup>  | 5.38 x 10 <sup>-5</sup> |  |
| 24  | cg10275770 | ICAM2    | 17        | 59437937  | -      | -3.64 ( 0.60 ) | 2.51 x 10 <sup>-9</sup>  | 5.76 x 10 <sup>-5</sup> |  |
| 25  | cg21492378 | CEP1     | 9         | 122890100 | +      | -3.68 ( 0.60 ) | 2.53 x 10 <sup>-9</sup>  | 5.79 x 10 <sup>-5</sup> |  |
| 26  | cg22381196 | DHODH    | 16        | 70598877  | +      | -2.24 ( 0.37 ) | 2.99 x 10 <sup>-9</sup>  | 6.85 x 10 <sup>-5</sup> |  |
| 27  | cg23140706 | NFE2     | 12        | 52975545  | -      | -4.22 ( 0.70 ) | 2.99 x 10 <sup>-9</sup>  | 6.86 x 10 <sup>-5</sup> |  |
| 28  | cg20283107 | FAM91A1  | 8         | 124858150 | +      | -3.65 ( 0.60 ) | 3.12 x 10 <sup>-9</sup>  | 7.15 x 10 <sup>-5</sup> |  |
| 29  | cg27606341 | FYB      | 5         | 39255389  | -      | -2.55 ( 0.42 ) | 3.21 x 10 <sup>-9</sup>  | 7.36 x 10 <sup>-5</sup> |  |
| 30  | cg26861460 | PARVG    | 22        | 42906788  | +      | -2.90 ( 0.48 ) | 3.27 x 10 <sup>-9</sup>  | 7.49 x 10 <sup>-5</sup> |  |
| 31  | cg18463686 | CLEC5A   | 7         | 141293159 | -      | -3.21 ( 0.53 ) | 3.32 x 10 <sup>-9</sup>  | 7.62 x 10 <sup>-5</sup> |  |
| 32  | cg16967583 | AGXT     | 2         | 241456532 | +      | -3.02 ( 0.50 ) | 3.47 x 10 <sup>-9</sup>  | 7.95 x 10 <sup>-5</sup> |  |
| 33  | cg25600606 | HIPK3    | 11        | 33264921  | +      | -2.58 ( 0.43 ) | 3.54 x 10 <sup>-9</sup>  | 8.13 x 10 <sup>-5</sup> |  |
| 34  | cg16097772 | LYZ      | 12        | 68028499  | +      | -3.02 ( 0.50 ) | 3.84 x 10 <sup>-9</sup>  | 8.81 x 10 <sup>-5</sup> |  |
| 35  | cg11283860 | SLC45A1  | 1         | 8195939   | +      | -2.47 ( 0.41 ) | 3.95 x 10 <sup>-9</sup>  | 9.05 x 10 <sup>-5</sup> |  |
| 36  | cg00333528 | GABRR1   | 6         | 89984204  | -      | -3.17 ( 0.53 ) | 4.50 x 10 <sup>-9</sup>  | 1.03 x 10 <sup>-4</sup> |  |
| 37  | cg08399444 | GSG1     | 12        | 13139815  | -      | -2.95 ( 0.49 ) | 4.62 x 10 <sup>-9</sup>  | 1.06 x 10 <sup>-4</sup> |  |

|    |            |           |    |           |   |                |                         |                         |
|----|------------|-----------|----|-----------|---|----------------|-------------------------|-------------------------|
| 38 | cg24211388 | AIF1      | 6  | 31690816  | + | -2.53 ( 0.42 ) | 4.76 x 10 <sup>-9</sup> | 1.09 x 10 <sup>-4</sup> |
| 39 | cg22825487 | VNN3      | 6  | 133096876 | - | -3.54 ( 0.59 ) | 4.99 x 10 <sup>-9</sup> | 1.14 x 10 <sup>-4</sup> |
| 40 | cg25634666 | FOLR3     | 11 | 71524436  | + | -2.62 ( 0.44 ) | 5.74 x 10 <sup>-9</sup> | 1.32 x 10 <sup>-4</sup> |
| 41 | cg22045288 | C10orf91  | 10 | 134108411 | + | -3.50 ( 0.59 ) | 6.00 x 10 <sup>-9</sup> | 1.38 x 10 <sup>-4</sup> |
| 42 | cg22016649 | PNPLA2    | 11 | 808917    | + | -3.58 ( 0.61 ) | 7.00 x 10 <sup>-9</sup> | 1.60 x 10 <sup>-4</sup> |
| 43 | cg11822932 | LMO2      | 11 | 33870292  | - | -3.02 ( 0.51 ) | 7.19 x 10 <sup>-9</sup> | 1.65 x 10 <sup>-4</sup> |
| 44 | cg02656594 | IL21R     | 16 | 27319997  | + | -3.03 ( 0.51 ) | 7.36 x 10 <sup>-9</sup> | 1.69 x 10 <sup>-4</sup> |
| 45 | cg14974772 | FBLN5     | 14 | 91484178  | - | -3.49 ( 0.59 ) | 7.53 x 10 <sup>-9</sup> | 1.73 x 10 <sup>-4</sup> |
| 46 | cg07285167 | CSF3R     | 1  | 36721568  | - | -2.73 ( 0.46 ) | 7.88 x 10 <sup>-9</sup> | 1.81 x 10 <sup>-4</sup> |
| 47 | cg00795812 | PDCD1     | 2  | 242450682 | - | 3.36 ( 0.57 )  | 8.96 x 10 <sup>-9</sup> | 2.06 x 10 <sup>-4</sup> |
| 48 | cg17356733 | IFNGR2    | 21 | 33696497  | + | -2.40 ( 0.41 ) | 9.82 x 10 <sup>-9</sup> | 2.25 x 10 <sup>-4</sup> |
| 49 | cg07218880 | UPF3A     | 13 | 114064381 | + | 3.01 ( 0.52 )  | 9.94 x 10 <sup>-9</sup> | 2.28 x 10 <sup>-4</sup> |
| 50 | cg00673191 | DOPEY2    | 21 | 36458793  | + | -3.44 ( 0.59 ) | 1.06 x 10 <sup>-8</sup> | 2.44 x 10 <sup>-4</sup> |
| 51 | cg26661623 | ASGR2     | 17 | 6959986   | - | -3.66 ( 0.63 ) | 1.12 x 10 <sup>-8</sup> | 2.56 x 10 <sup>-4</sup> |
| 52 | cg07958192 | TIGD2     | 4  | 90252997  | + | -3.54 ( 0.61 ) | 1.12 x 10 <sup>-8</sup> | 2.56 x 10 <sup>-4</sup> |
| 53 | cg10266490 | ACOT11    | 1  | 54786297  | + | -3.38 ( 0.58 ) | 1.13 x 10 <sup>-8</sup> | 2.60 x 10 <sup>-4</sup> |
| 54 | cg02863947 | NR1I2     | 3  | 120981880 | + | -2.69 ( 0.46 ) | 1.15 x 10 <sup>-8</sup> | 2.64 x 10 <sup>-4</sup> |
| 55 | cg23547429 | SLC43A3   | 11 | 56951601  | - | -3.11 ( 0.54 ) | 1.18 x 10 <sup>-8</sup> | 2.70 x 10 <sup>-4</sup> |
| 56 | cg23889010 | SLPI      | 20 | 43316404  | - | -3.04 ( 0.52 ) | 1.22 x 10 <sup>-8</sup> | 2.79 x 10 <sup>-4</sup> |
| 57 | cg09868035 | C20orf135 | 20 | 61962518  | + | -3.52 ( 0.61 ) | 1.25 x 10 <sup>-8</sup> | 2.86 x 10 <sup>-4</sup> |
| 58 | cg27485921 | ATP6V1E2  | 2  | 46600883  | - | -2.83 ( 0.49 ) | 1.27 x 10 <sup>-8</sup> | 2.92 x 10 <sup>-4</sup> |
| 59 | cg14511156 | OSCAR     | 19 | 59295936  | - | -3.57 ( 0.62 ) | 1.50 x 10 <sup>-8</sup> | 3.45 x 10 <sup>-4</sup> |
| 60 | cg17813891 | EVL       | 14 | 99601789  | + | 3.03 ( 0.53 )  | 1.52 x 10 <sup>-8</sup> | 3.49 x 10 <sup>-4</sup> |
| 61 | cg22630748 | INHBE     | 12 | 56135137  | + | -3.81 ( 0.66 ) | 1.53 x 10 <sup>-8</sup> | 3.52 x 10 <sup>-4</sup> |
| 62 | cg11384427 | TNFRSF7   | 12 | 6423846   | + | 3.61 ( 0.63 )  | 1.55 x 10 <sup>-8</sup> | 3.54 x 10 <sup>-4</sup> |
| 63 | cg00145118 | GNPDA1    | 5  | 141374115 | - | -3.63 ( 0.63 ) | 1.55 x 10 <sup>-8</sup> | 3.55 x 10 <sup>-4</sup> |
| 64 | cg09001777 | FUT3      | 19 | 5802504   | - | -3.24 ( 0.56 ) | 1.61 x 10 <sup>-8</sup> | 3.70 x 10 <sup>-4</sup> |
| 65 | cg04988978 | MPO       | 17 | 53714577  | - | -3.57 ( 0.62 ) | 1.86 x 10 <sup>-8</sup> | 4.27 x 10 <sup>-4</sup> |
| 66 | cg04353769 | MS4A6A    | 11 | 59708133  | - | -2.94 ( 0.51 ) | 1.94 x 10 <sup>-8</sup> | 4.44 x 10 <sup>-4</sup> |
| 67 | cg16361890 | LTC4S     | 5  | 179153151 | + | -3.59 ( 0.63 ) | 1.97 x 10 <sup>-8</sup> | 4.51 x 10 <sup>-4</sup> |
| 68 | cg03886110 | PECAM1    | 17 | 59817773  | - | -2.89 ( 0.51 ) | 1.98 x 10 <sup>-8</sup> | 4.53 x 10 <sup>-4</sup> |
| 69 | cg17714799 | CASP6     | 4  | 110844529 | - | -2.97 ( 0.52 ) | 2.01 x 10 <sup>-8</sup> | 4.60 x 10 <sup>-4</sup> |
| 70 | cg24777950 | CTSG      | 14 | 24115961  | - | -2.57 ( 0.45 ) | 2.14 x 10 <sup>-8</sup> | 4.91 x 10 <sup>-4</sup> |
| 71 | cg14654385 | URP2      | 11 | 63729582  | + | -2.61 ( 0.46 ) | 2.30 x 10 <sup>-8</sup> | 5.27 x 10 <sup>-4</sup> |
| 72 | cg10161121 | FASLG     | 1  | 170894643 | + | 2.91 ( 0.51 )  | 2.34 x 10 <sup>-8</sup> | 5.36 x 10 <sup>-4</sup> |
| 73 | cg21126943 | CEACAM6   | 19 | 46951235  | + | -2.85 ( 0.50 ) | 2.37 x 10 <sup>-8</sup> | 5.43 x 10 <sup>-4</sup> |
| 74 | cg25028542 | ANLN      | 7  | 36395645  | + | -4.12 ( 0.73 ) | 2.45 x 10 <sup>-8</sup> | 5.61 x 10 <sup>-4</sup> |
| 75 | cg22534509 | GPR81     | 12 | 121781072 | - | 2.75 ( 0.49 )  | 2.55 x 10 <sup>-8</sup> | 5.85 x 10 <sup>-4</sup> |
| 76 | cg27019278 | EMCN      | 4  | 101657827 | - | -3.51 ( 0.62 ) | 2.64 x 10 <sup>-8</sup> | 6.04 x 10 <sup>-4</sup> |
| 77 | cg02266731 | CPM       | 12 | 67643600  | - | -3.40 ( 0.60 ) | 2.67 x 10 <sup>-8</sup> | 6.11 x 10 <sup>-4</sup> |

|     |            |           |    |           |   |                |                         |                         |
|-----|------------|-----------|----|-----------|---|----------------|-------------------------|-------------------------|
| 78  | cg11098259 | AQP9      | 15 | 56217683  | + | -3.11 ( 0.55 ) | 2.80 x 10 <sup>-8</sup> | 6.41 x 10 <sup>-4</sup> |
| 79  | cg27461196 | FXYD1     | 19 | 40321946  | + | -3.09 ( 0.55 ) | 2.83 x 10 <sup>-8</sup> | 6.50 x 10 <sup>-4</sup> |
| 80  | cg17186163 | C10orf10  | 10 | 44794323  | - | -3.74 ( 0.66 ) | 3.21 x 10 <sup>-8</sup> | 7.36 x 10 <sup>-4</sup> |
| 81  | cg24474182 | P2RY13    | 3  | 152529997 | - | -3.02 ( 0.54 ) | 3.31 x 10 <sup>-8</sup> | 7.59 x 10 <sup>-4</sup> |
| 82  | cg22820108 | NCOR2     | 12 | 123569171 | - | -4.11 ( 0.73 ) | 3.37 x 10 <sup>-8</sup> | 7.73 x 10 <sup>-4</sup> |
| 83  | cg02473123 | CD7       | 17 | 77868065  | - | 4.04 ( 0.72 )  | 3.46 x 10 <sup>-8</sup> | 7.93 x 10 <sup>-4</sup> |
| 84  | cg21917349 | APBA2     | 15 | 27001152  | + | 3.37 ( 0.60 )  | 3.72 x 10 <sup>-8</sup> | 8.54 x 10 <sup>-4</sup> |
| 85  | cg00071250 | FASLG     | 1  | 170894886 | + | 2.55 ( 0.46 )  | 3.83 x 10 <sup>-8</sup> | 8.78 x 10 <sup>-4</sup> |
| 86  | cg13030582 | MFAP4     | 17 | 19231301  | - | -3.45 ( 0.62 ) | 4.06 x 10 <sup>-8</sup> | 9.31 x 10 <sup>-4</sup> |
| 87  | cg07658590 | SLC19A1   | 21 | 45788015  | - | -2.87 ( 0.51 ) | 4.07 x 10 <sup>-8</sup> | 9.32 x 10 <sup>-4</sup> |
| 88  | cg21991396 | CIAS1     | 1  | 245648040 | + | -2.23 ( 0.40 ) | 4.24 x 10 <sup>-8</sup> | 9.71 x 10 <sup>-4</sup> |
| 89  | cg13053608 | LGP1      | 17 | 37599199  | - | -2.67 ( 0.48 ) | 4.24 x 10 <sup>-8</sup> | 9.73 x 10 <sup>-4</sup> |
| 90  | cg11827101 | LOC339789 | 2  | 8385873   | - | -3.67 ( 0.66 ) | 4.31 x 10 <sup>-8</sup> | 9.87 x 10 <sup>-4</sup> |
| 91  | cg01965939 | SH3TC2    | 5  | 148422887 | - | -3.79 ( 0.68 ) | 4.31 x 10 <sup>-8</sup> | 9.89 x 10 <sup>-4</sup> |
| 92  | cg13277939 | CTAGE5    | 14 | 38804962  | + | -3.18 ( 0.57 ) | 4.72 x 10 <sup>-8</sup> | 1.08 x 10 <sup>-3</sup> |
| 93  | cg08700306 | LRP3      | 19 | 38378230  | + | -3.54 ( 0.64 ) | 4.81 x 10 <sup>-8</sup> | 1.10 x 10 <sup>-3</sup> |
| 94  | cg08044694 | BRD4      | 19 | 15252927  | - | -2.32 ( 0.42 ) | 4.94 x 10 <sup>-8</sup> | 1.13 x 10 <sup>-3</sup> |
| 95  | cg05859264 | MAPK13    | 6  | 36205670  | + | 3.46 ( 0.63 )  | 5.11 x 10 <sup>-8</sup> | 1.17 x 10 <sup>-3</sup> |
| 96  | cg26105232 | IL2RA     | 10 | 6145662   | - | -3.73 ( 0.67 ) | 5.35 x 10 <sup>-8</sup> | 1.23 x 10 <sup>-3</sup> |
| 97  | cg02240622 | PLCB2     | 15 | 38388759  | - | -2.40 ( 0.44 ) | 5.73 x 10 <sup>-8</sup> | 1.31 x 10 <sup>-3</sup> |
| 98  | cg19154438 | CKM       | 19 | 50517570  | - | 3.87 ( 0.70 )  | 5.84 x 10 <sup>-8</sup> | 1.34 x 10 <sup>-3</sup> |
| 99  | cg16509045 | TRPM6     | 9  | 76692783  | - | -2.78 ( 0.51 ) | 6.13 x 10 <sup>-8</sup> | 1.40 x 10 <sup>-3</sup> |
| 100 | cg21019522 | SLC22A18  | 11 | 2877365   | + | -3.22 ( 0.58 ) | 6.22 x 10 <sup>-8</sup> | 1.43 x 10 <sup>-3</sup> |
| 101 | cg11983245 | KRT15     | 17 | 36928680  | - | 5.49 ( 1.00 )  | 6.45 x 10 <sup>-8</sup> | 1.48 x 10 <sup>-3</sup> |
| 102 | cg00899659 | ZNF22     | 10 | 44815977  | + | -2.98 ( 0.54 ) | 6.67 x 10 <sup>-8</sup> | 1.53 x 10 <sup>-3</sup> |
| 103 | cg06317209 | AVIL      | 12 | 56497145  | - | -3.51 ( 0.64 ) | 7.05 x 10 <sup>-8</sup> | 1.62 x 10 <sup>-3</sup> |
| 104 | cg05000446 | MGC41945  | 9  | 35032395  | + | -2.98 ( 0.54 ) | 7.06 x 10 <sup>-8</sup> | 1.62 x 10 <sup>-3</sup> |
| 105 | cg09624565 | NCF4      | 22 | 35586846  | + | -3.63 ( 0.66 ) | 7.07 x 10 <sup>-8</sup> | 1.62 x 10 <sup>-3</sup> |
| 106 | cg21400896 | ABI3      | 17 | 44643568  | + | 3.61 ( 0.66 )  | 7.16 x 10 <sup>-8</sup> | 1.64 x 10 <sup>-3</sup> |
| 107 | cg13471990 | ENTPD1    | 10 | 97505212  | + | -3.53 ( 0.65 ) | 7.24 x 10 <sup>-8</sup> | 1.66 x 10 <sup>-3</sup> |
| 108 | cg13703437 | FYB       | 5  | 39255455  | - | -2.60 ( 0.48 ) | 7.30 x 10 <sup>-8</sup> | 1.67 x 10 <sup>-3</sup> |
| 109 | cg14324675 | LST1      | 6  | 31662827  | + | -2.98 ( 0.54 ) | 7.48 x 10 <sup>-8</sup> | 1.71 x 10 <sup>-3</sup> |
| 110 | cg02600394 | TXK       | 4  | 47830991  | - | 3.18 ( 0.58 )  | 7.60 x 10 <sup>-8</sup> | 1.74 x 10 <sup>-3</sup> |
| 111 | cg10061138 | STAB1     | 3  | 52504125  | + | -3.55 ( 0.65 ) | 7.63 x 10 <sup>-8</sup> | 1.75 x 10 <sup>-3</sup> |
| 112 | cg17839611 | GNGT2     | 17 | 44641801  | - | 3.31 ( 0.61 )  | 7.68 x 10 <sup>-8</sup> | 1.76 x 10 <sup>-3</sup> |
| 113 | cg24427660 | PNPLA2    | 11 | 808892    | + | -2.37 ( 0.44 ) | 8.63 x 10 <sup>-8</sup> | 1.98 x 10 <sup>-3</sup> |
| 114 | cg09076077 | FLJ33860  | 20 | 58063710  | + | -2.48 ( 0.46 ) | 8.77 x 10 <sup>-8</sup> | 2.01 x 10 <sup>-3</sup> |
| 115 | cg06270401 | DYRK4     | 12 | 4569346   | + | -2.28 ( 0.42 ) | 9.09 x 10 <sup>-8</sup> | 2.08 x 10 <sup>-3</sup> |
| 116 | cg17709873 | LTA       | 6  | 31648435  | + | 2.91 ( 0.54 )  | 9.16 x 10 <sup>-8</sup> | 2.10 x 10 <sup>-3</sup> |
| 117 | cg09914304 | PRF1      | 10 | 72032298  | - | 3.48 ( 0.64 )  | 9.84 x 10 <sup>-8</sup> | 2.26 x 10 <sup>-3</sup> |

|     |            |           |    |           |   |                |                         |                         |
|-----|------------|-----------|----|-----------|---|----------------|-------------------------|-------------------------|
| 118 | cg27285056 | NAPSA     | 19 | 55560691  | - | 3.54 ( 0.66 )  | 1.03 x 10 <sup>-7</sup> | 2.37 x 10 <sup>-3</sup> |
| 119 | cg08539991 | ZBTB32    | 19 | 40895672  | + | 2.79 ( 0.52 )  | 1.06 x 10 <sup>-7</sup> | 2.43 x 10 <sup>-3</sup> |
| 120 | cg00323915 | GIMAP4    | 7  | 149895920 | + | 3.11 ( 0.58 )  | 1.06 x 10 <sup>-7</sup> | 2.43 x 10 <sup>-3</sup> |
| 121 | cg01402255 | GATAD2B   | 1  | 152067323 | - | -2.66 ( 0.49 ) | 1.09 x 10 <sup>-7</sup> | 2.49 x 10 <sup>-3</sup> |
| 122 | cg26701826 | MGC26963  | 4  | 109034053 | + | -2.53 ( 0.47 ) | 1.11 x 10 <sup>-7</sup> | 2.55 x 10 <sup>-3</sup> |
| 123 | cg02374486 | PRF1      | 10 | 72032815  | - | 3.73 ( 0.69 )  | 1.12 x 10 <sup>-7</sup> | 2.57 x 10 <sup>-3</sup> |
| 124 | cg24926276 | LRG1      | 19 | 4490943   | - | -2.71 ( 0.50 ) | 1.16 x 10 <sup>-7</sup> | 2.66 x 10 <sup>-3</sup> |
| 125 | cg26540515 | ANGPT4    | 20 | 844349    | - | -3.99 ( 0.74 ) | 1.19 x 10 <sup>-7</sup> | 2.73 x 10 <sup>-3</sup> |
| 126 | cg01813965 | C16orf50  | 16 | 56286605  | + | -2.86 ( 0.53 ) | 1.24 x 10 <sup>-7</sup> | 2.85 x 10 <sup>-3</sup> |
| 127 | cg04759756 | SLA2      | 20 | 34707347  | - | 3.17 ( 0.59 )  | 1.34 x 10 <sup>-7</sup> | 3.08 x 10 <sup>-3</sup> |
| 128 | cg00546897 | LOC284837 | 21 | 44056660  | - | -2.87 ( 0.54 ) | 1.40 x 10 <sup>-7</sup> | 3.22 x 10 <sup>-3</sup> |
| 129 | cg20018806 | TCN1      | 11 | 59390450  | - | -4.12 ( 0.77 ) | 1.40 x 10 <sup>-7</sup> | 3.22 x 10 <sup>-3</sup> |
| 130 | cg18350391 | IL32      | 16 | 3055553   | + | 3.15 ( 0.59 )  | 1.43 x 10 <sup>-7</sup> | 3.28 x 10 <sup>-3</sup> |
| 131 | cg15739581 | GALNT3    | 2  | 166335029 | - | -3.17 ( 0.59 ) | 1.48 x 10 <sup>-7</sup> | 3.39 x 10 <sup>-3</sup> |
| 132 | cg04451770 | ENTPD1    | 10 | 97505362  | + | -2.43 ( 0.46 ) | 1.48 x 10 <sup>-7</sup> | 3.40 x 10 <sup>-3</sup> |
| 133 | cg09499849 | ACVR1     | 2  | 158403404 | - | -3.10 ( 0.58 ) | 1.49 x 10 <sup>-7</sup> | 3.42 x 10 <sup>-3</sup> |
| 134 | cg16280667 | BLR1      | 11 | 118259803 | + | 4.89 ( 0.92 )  | 1.53 x 10 <sup>-7</sup> | 3.51 x 10 <sup>-3</sup> |
| 135 | cg00415993 | F2RL2     | 5  | 75954944  | - | -2.33 ( 0.44 ) | 1.60 x 10 <sup>-7</sup> | 3.67 x 10 <sup>-3</sup> |
| 136 | cg06172871 | HP        | 16 | 70645745  | + | -2.63 ( 0.50 ) | 1.62 x 10 <sup>-7</sup> | 3.70 x 10 <sup>-3</sup> |
| 137 | cg26928972 | CSTA      | 3  | 123526489 | + | -2.83 ( 0.53 ) | 1.69 x 10 <sup>-7</sup> | 3.86 x 10 <sup>-3</sup> |
| 138 | cg07730301 | ALDH3B1   | 11 | 67534528  | + | -3.05 ( 0.58 ) | 1.71 x 10 <sup>-7</sup> | 3.92 x 10 <sup>-3</sup> |
| 139 | cg01623438 | CTSZ      | 20 | 57016289  | - | -3.11 ( 0.59 ) | 1.91 x 10 <sup>-7</sup> | 4.38 x 10 <sup>-3</sup> |
| 140 | cg07409200 | FLJ40919  | 13 | 42252674  | + | -2.90 ( 0.55 ) | 1.92 x 10 <sup>-7</sup> | 4.40 x 10 <sup>-3</sup> |
| 141 | cg24091474 | TYROBP    | 19 | 41091025  | - | -2.37 ( 0.45 ) | 1.98 x 10 <sup>-7</sup> | 4.53 x 10 <sup>-3</sup> |
| 142 | cg17980508 | IFI44L    | 1  | 78858301  | + | -2.89 ( 0.55 ) | 2.02 x 10 <sup>-7</sup> | 4.63 x 10 <sup>-3</sup> |
| 143 | cg24453664 | CD59      | 11 | 33714989  | - | -2.34 ( 0.44 ) | 2.03 x 10 <sup>-7</sup> | 4.65 x 10 <sup>-3</sup> |
| 144 | cg25226014 | CXCR6     | 3  | 45959946  | + | 2.96 ( 0.56 )  | 2.19 x 10 <sup>-7</sup> | 5.03 x 10 <sup>-3</sup> |
| 145 | cg16592658 | EBI3      | 19 | 4180887   | + | 2.95 ( 0.56 )  | 2.20 x 10 <sup>-7</sup> | 5.04 x 10 <sup>-3</sup> |
| 146 | cg26112639 | CIAS1     | 1  | 245646729 | + | -2.73 ( 0.52 ) | 2.39 x 10 <sup>-7</sup> | 5.47 x 10 <sup>-3</sup> |
| 147 | cg19963522 | PIP3-E    | 6  | 154719488 | - | -2.95 ( 0.56 ) | 2.39 x 10 <sup>-7</sup> | 5.49 x 10 <sup>-3</sup> |
| 148 | cg18338021 | GZMM      | 19 | 495349    | + | 3.98 ( 0.76 )  | 2.41 x 10 <sup>-7</sup> | 5.52 x 10 <sup>-3</sup> |
| 149 | cg11340260 | GP1BA     | 17 | 4776256   | + | -3.25 ( 0.62 ) | 2.51 x 10 <sup>-7</sup> | 5.76 x 10 <sup>-3</sup> |
| 150 | cg19812619 | ITGB7     | 12 | 51886921  | - | 3.20 ( 0.61 )  | 2.52 x 10 <sup>-7</sup> | 5.77 x 10 <sup>-3</sup> |
| 151 | cg01980222 | TREM2     | 6  | 41238895  | - | -3.25 ( 0.62 ) | 2.53 x 10 <sup>-7</sup> | 5.81 x 10 <sup>-3</sup> |
| 152 | cg08130265 | C15orf5   | 15 | 75306225  | - | -3.06 ( 0.58 ) | 2.58 x 10 <sup>-7</sup> | 5.92 x 10 <sup>-3</sup> |
| 153 | cg08837884 | LRG1      | 19 | 4491782   | - | -3.92 ( 0.75 ) | 2.67 x 10 <sup>-7</sup> | 6.11 x 10 <sup>-3</sup> |
| 154 | cg21842274 | CRHBP     | 5  | 76284393  | + | -3.85 ( 0.74 ) | 2.73 x 10 <sup>-7</sup> | 6.26 x 10 <sup>-3</sup> |
| 155 | cg18638581 | HK2       | 2  | 74913110  | + | -2.54 ( 0.49 ) | 2.74 x 10 <sup>-7</sup> | 6.28 x 10 <sup>-3</sup> |
| 156 | cg11721194 | SLAMF7    | 1  | 158975863 | + | 3.40 ( 0.65 )  | 2.75 x 10 <sup>-7</sup> | 6.30 x 10 <sup>-3</sup> |
| 157 | cg14973995 | TETRA     | 4  | 2905490   | - | -2.08 ( 0.40 ) | 2.76 x 10 <sup>-7</sup> | 6.33 x 10 <sup>-3</sup> |

|     |            |          |    |           |   |                 |                         |                         |
|-----|------------|----------|----|-----------|---|-----------------|-------------------------|-------------------------|
| 158 | cg11432797 | SPN      | 16 | 29581988  | + | -10.38 ( 1.99 ) | 2.88 x 10 <sup>-7</sup> | 6.60 x 10 <sup>-3</sup> |
| 159 | cg15512851 | FGD2     | 6  | 37081496  | + | -2.68 ( 0.52 )  | 2.88 x 10 <sup>-7</sup> | 6.61 x 10 <sup>-3</sup> |
| 160 | cg13504059 | CCR7     | 17 | 35975468  | - | 3.23 ( 0.62 )   | 2.90 x 10 <sup>-7</sup> | 6.64 x 10 <sup>-3</sup> |
| 161 | cg17740645 | GRB7     | 17 | 35147939  | + | -2.32 ( 0.44 )  | 2.90 x 10 <sup>-7</sup> | 6.65 x 10 <sup>-3</sup> |
| 162 | cg05252264 | FCAR     | 19 | 60077399  | + | -2.92 ( 0.56 )  | 2.92 x 10 <sup>-7</sup> | 6.70 x 10 <sup>-3</sup> |
| 163 | cg05961212 | ADPRH    | 3  | 120780885 | + | -3.52 ( 0.68 )  | 2.93 x 10 <sup>-7</sup> | 6.72 x 10 <sup>-3</sup> |
| 164 | cg13745346 | CBFA2T3  | 16 | 87572024  | - | -3.21 ( 0.62 )  | 3.06 x 10 <sup>-7</sup> | 7.01 x 10 <sup>-3</sup> |
| 165 | cg13500819 | PACAP    | 5  | 138753299 | - | 3.19 ( 0.62 )   | 3.27 x 10 <sup>-7</sup> | 7.50 x 10 <sup>-3</sup> |
| 166 | cg18149207 | RORC     | 1  | 150072258 | - | 5.04 ( 0.97 )   | 3.33 x 10 <sup>-7</sup> | 7.64 x 10 <sup>-3</sup> |
| 167 | cg04536922 | FAM13A1  | 4  | 90197589  | - | -2.97 ( 0.58 )  | 3.73 x 10 <sup>-7</sup> | 8.55 x 10 <sup>-3</sup> |
| 168 | cg07924575 | HPS4     | 22 | 25211231  | - | -3.34 ( 0.65 )  | 3.73 x 10 <sup>-7</sup> | 8.56 x 10 <sup>-3</sup> |
| 169 | cg12943082 | CCL26    | 7  | 75257247  | - | -2.04 ( 0.40 )  | 3.75 x 10 <sup>-7</sup> | 8.59 x 10 <sup>-3</sup> |
| 170 | cg12629325 | PCDHAC1  | 5  | 140286642 | + | -3.04 ( 0.59 )  | 3.93 x 10 <sup>-7</sup> | 9.01 x 10 <sup>-3</sup> |
| 171 | cg17676574 | UROC1    | 3  | 127720063 | - | 4.19 ( 0.82 )   | 4.09 x 10 <sup>-7</sup> | 9.37 x 10 <sup>-3</sup> |
| 172 | cg00431050 | ELOVL3   | 10 | 103975720 | + | -4.25 ( 0.83 )  | 4.28 x 10 <sup>-7</sup> | 9.80 x 10 <sup>-3</sup> |
| 173 | cg12554857 | PGDS     | 4  | 95483042  | - | -2.80 ( 0.55 )  | 4.38 x 10 <sup>-7</sup> | 1.01 x 10 <sup>-2</sup> |
| 174 | cg25066857 | GPLY     | 2  | 85774949  | + | 3.55 ( 0.69 )   | 4.44 x 10 <sup>-7</sup> | 1.02 x 10 <sup>-2</sup> |
| 175 | cg00112517 | PPP1R1B  | 17 | 35036537  | + | -4.63 ( 0.91 )  | 4.67 x 10 <sup>-7</sup> | 1.07 x 10 <sup>-2</sup> |
| 176 | cg15528736 | FCGRT    | 19 | 54707592  | + | -2.41 ( 0.47 )  | 4.92 x 10 <sup>-7</sup> | 1.13 x 10 <sup>-2</sup> |
| 177 | cg17952262 | MFSD7    | 4  | 673240    | - | -3.42 ( 0.67 )  | 5.36 x 10 <sup>-7</sup> | 1.23 x 10 <sup>-2</sup> |
| 178 | cg25587233 | PPP2R4   | 9  | 130911826 | + | -3.31 ( 0.65 )  | 5.40 x 10 <sup>-7</sup> | 1.24 x 10 <sup>-2</sup> |
| 179 | cg20713492 | AQP10    | 1  | 152560106 | + | -3.36 ( 0.66 )  | 5.47 x 10 <sup>-7</sup> | 1.25 x 10 <sup>-2</sup> |
| 180 | cg01367992 | LY9      | 1  | 159033159 | + | 2.67 ( 0.53 )   | 5.52 x 10 <sup>-7</sup> | 1.27 x 10 <sup>-2</sup> |
| 181 | cg15784615 | LTBR     | 12 | 6364028   | + | -2.75 ( 0.54 )  | 5.58 x 10 <sup>-7</sup> | 1.28 x 10 <sup>-2</sup> |
| 182 | cg22088368 | MGC35206 | 22 | 35734834  | - | -4.00 ( 0.79 )  | 5.65 x 10 <sup>-7</sup> | 1.30 x 10 <sup>-2</sup> |
| 183 | cg04653308 | PPP2R4   | 9  | 130911839 | + | -3.23 ( 0.64 )  | 5.69 x 10 <sup>-7</sup> | 1.30 x 10 <sup>-2</sup> |
| 184 | cg19906550 | SLC22A18 | 11 | 2877375   | + | -3.02 ( 0.60 )  | 5.75 x 10 <sup>-7</sup> | 1.32 x 10 <sup>-2</sup> |
| 185 | cg25165199 | RCBTB2   | 13 | 48005694  | - | -2.99 ( 0.59 )  | 5.97 x 10 <sup>-7</sup> | 1.37 x 10 <sup>-2</sup> |
| 186 | cg05697976 | MLSTD1   | 12 | 29267750  | + | -3.00 ( 0.59 )  | 6.26 x 10 <sup>-7</sup> | 1.43 x 10 <sup>-2</sup> |
| 187 | cg15518883 | SIT1     | 9  | 35640561  | - | 2.68 ( 0.53 )   | 6.28 x 10 <sup>-7</sup> | 1.44 x 10 <sup>-2</sup> |
| 188 | cg05253159 | APS      | 7  | 101715280 | + | -4.09 ( 0.81 )  | 6.36 x 10 <sup>-7</sup> | 1.46 x 10 <sup>-2</sup> |
| 189 | cg21578541 | TLR9     | 3  | 52235130  | - | -3.18 ( 0.63 )  | 6.40 x 10 <sup>-7</sup> | 1.47 x 10 <sup>-2</sup> |
| 190 | cg08445039 | FKBP9    | 7  | 32964184  | + | -3.65 ( 0.72 )  | 6.42 x 10 <sup>-7</sup> | 1.47 x 10 <sup>-2</sup> |
| 191 | cg18390025 | ELOVL3   | 10 | 103976726 | + | -2.75 ( 0.54 )  | 6.46 x 10 <sup>-7</sup> | 1.48 x 10 <sup>-2</sup> |
| 192 | cg06196379 | TREM1    | 6  | 41362863  | - | -3.31 ( 0.66 )  | 6.91 x 10 <sup>-7</sup> | 1.58 x 10 <sup>-2</sup> |
| 193 | cg26581729 | NPDC1    | 9  | 139059613 | - | -2.38 ( 0.47 )  | 6.95 x 10 <sup>-7</sup> | 1.59 x 10 <sup>-2</sup> |
| 194 | cg04183425 | ASF1A    | 6  | 119262978 | + | 3.50 ( 0.70 )   | 6.99 x 10 <sup>-7</sup> | 1.60 x 10 <sup>-2</sup> |
| 195 | cg05989054 | GAMT     | 19 | 1353626   | - | -3.41 ( 0.68 )  | 7.01 x 10 <sup>-7</sup> | 1.61 x 10 <sup>-2</sup> |
| 196 | cg10287137 | P2RY2    | 11 | 72606702  | + | -2.27 ( 0.45 )  | 7.24 x 10 <sup>-7</sup> | 1.66 x 10 <sup>-2</sup> |
| 197 | cg18468842 | SLC13A3  | 20 | 44746516  | - | -3.46 ( 0.69 )  | 7.24 x 10 <sup>-7</sup> | 1.66 x 10 <sup>-2</sup> |

|     |            |           |    |           |   |                |                         |                         |
|-----|------------|-----------|----|-----------|---|----------------|-------------------------|-------------------------|
| 198 | cg13553498 | CLEC2D    | 12 | 9713253   | + | 2.94 ( 0.59 )  | 7.62 x 10 <sup>-7</sup> | 1.75 x 10 <sup>-2</sup> |
| 199 | cg16872071 | RALGDS    | 9  | 134986976 | - | -2.90 ( 0.58 ) | 7.72 x 10 <sup>-7</sup> | 1.77 x 10 <sup>-2</sup> |
| 200 | cg26697117 | P2RX1     | 17 | 3767267   | - | -4.10 ( 0.82 ) | 7.83 x 10 <sup>-7</sup> | 1.80 x 10 <sup>-2</sup> |
| 201 | cg19399532 | FLJ35530  | 1  | 176779118 | + | -2.45 ( 0.49 ) | 7.97 x 10 <sup>-7</sup> | 1.83 x 10 <sup>-2</sup> |
| 202 | cg15227982 | C10orf26  | 10 | 104525844 | + | -2.62 ( 0.52 ) | 8.08 x 10 <sup>-7</sup> | 1.85 x 10 <sup>-2</sup> |
| 203 | cg15361231 | GLRX2     | 1  | 191341814 | - | -2.54 ( 0.51 ) | 8.14 x 10 <sup>-7</sup> | 1.87 x 10 <sup>-2</sup> |
| 204 | cg15743985 | CD22      | 19 | 40511649  | + | -2.74 ( 0.55 ) | 8.24 x 10 <sup>-7</sup> | 1.89 x 10 <sup>-2</sup> |
| 205 | cg22933847 | MRGPRF    | 11 | 68536712  | - | -3.30 ( 0.66 ) | 8.51 x 10 <sup>-7</sup> | 1.95 x 10 <sup>-2</sup> |
| 206 | cg24898863 | S100A8    | 1  | 151630204 | - | -2.90 ( 0.58 ) | 8.64 x 10 <sup>-7</sup> | 1.98 x 10 <sup>-2</sup> |
| 207 | cg00648883 | LOC196549 | 13 | 31422761  | + | -3.34 ( 0.67 ) | 1.01 x 10 <sup>-6</sup> | 2.32 x 10 <sup>-2</sup> |
| 208 | cg05714729 | GALNT1    | 18 | 31488094  | + | -2.46 ( 0.50 ) | 1.03 x 10 <sup>-6</sup> | 2.37 x 10 <sup>-2</sup> |
| 209 | cg15121304 |           | 22 | 20710100  | + | 4.54 ( 0.92 )  | 1.04 x 10 <sup>-6</sup> | 2.37 x 10 <sup>-2</sup> |
| 210 | cg02516189 | CARD9     | 9  | 138387913 | - | -3.88 ( 0.78 ) | 1.04 x 10 <sup>-6</sup> | 2.38 x 10 <sup>-2</sup> |
| 211 | cg02332073 | TSGA13    | 7  | 130022959 | - | -2.85 ( 0.58 ) | 1.08 x 10 <sup>-6</sup> | 2.48 x 10 <sup>-2</sup> |
| 212 | cg17142183 | IL1R2     | 2  | 101974624 | + | -2.51 ( 0.51 ) | 1.08 x 10 <sup>-6</sup> | 2.48 x 10 <sup>-2</sup> |
| 213 | cg00666746 | SYDE1     | 19 | 15078781  | + | -2.86 ( 0.58 ) | 1.09 x 10 <sup>-6</sup> | 2.51 x 10 <sup>-2</sup> |
| 214 | cg03852570 | C10orf33  | 10 | 100165096 | - | -3.34 ( 0.68 ) | 1.11 x 10 <sup>-6</sup> | 2.54 x 10 <sup>-2</sup> |
| 215 | cg23696618 | SERPINB10 | 18 | 59734679  | + | -3.31 ( 0.67 ) | 1.14 x 10 <sup>-6</sup> | 2.61 x 10 <sup>-2</sup> |
| 216 | cg07525077 | RNASE3    | 14 | 20429783  | + | -2.90 ( 0.59 ) | 1.15 x 10 <sup>-6</sup> | 2.64 x 10 <sup>-2</sup> |
| 217 | cg06791867 | TSPAN18   | 11 | 44837520  | + | -3.90 ( 0.79 ) | 1.17 x 10 <sup>-6</sup> | 2.67 x 10 <sup>-2</sup> |
| 218 | cg02415431 | IPLL1     | 22 | 22253255  | - | -4.18 ( 0.85 ) | 1.19 x 10 <sup>-6</sup> | 2.72 x 10 <sup>-2</sup> |
| 219 | cg08529852 | EGFL7     | 9  | 138677741 | + | -2.80 ( 0.57 ) | 1.20 x 10 <sup>-6</sup> | 2.75 x 10 <sup>-2</sup> |
| 220 | cg18538812 | GIF       | 11 | 59370671  | - | 3.22 ( 0.65 )  | 1.24 x 10 <sup>-6</sup> | 2.84 x 10 <sup>-2</sup> |
| 221 | cg01182697 | TMEM59    | 1  | 54293020  | - | -2.71 ( 0.55 ) | 1.24 x 10 <sup>-6</sup> | 2.85 x 10 <sup>-2</sup> |
| 222 | cg11630392 | GPR171    | 3  | 152403654 | - | 3.61 ( 0.73 )  | 1.25 x 10 <sup>-6</sup> | 2.87 x 10 <sup>-2</sup> |
| 223 | cg23571857 | BIRC4BP   | 17 | 6599622   | + | -3.14 ( 0.64 ) | 1.29 x 10 <sup>-6</sup> | 2.97 x 10 <sup>-2</sup> |
| 224 | cg18413900 | CYP27B1   | 12 | 56447256  | - | -3.57 ( 0.73 ) | 1.31 x 10 <sup>-6</sup> | 3.00 x 10 <sup>-2</sup> |
| 225 | cg15146752 | EPHA2     | 1  | 16355354  | - | -2.28 ( 0.47 ) | 1.32 x 10 <sup>-6</sup> | 3.02 x 10 <sup>-2</sup> |
| 226 | cg15376097 | EVA1      | 11 | 117640480 | - | -3.99 ( 0.81 ) | 1.33 x 10 <sup>-6</sup> | 3.04 x 10 <sup>-2</sup> |
| 227 | cg20674521 | KCNJ4     | 22 | 37180467  | - | 4.48 ( 0.92 )  | 1.33 x 10 <sup>-6</sup> | 3.06 x 10 <sup>-2</sup> |
| 228 | cg22424746 | VTCN1     | 1  | 117554836 | - | 3.87 ( 0.79 )  | 1.37 x 10 <sup>-6</sup> | 3.15 x 10 <sup>-2</sup> |
| 229 | cg08598221 | SNTB1     | 8  | 121894110 | - | -2.98 ( 0.61 ) | 1.40 x 10 <sup>-6</sup> | 3.21 x 10 <sup>-2</sup> |
| 230 | cg01441777 | CSNK1E    | 22 | 37044362  | - | -2.31 ( 0.47 ) | 1.41 x 10 <sup>-6</sup> | 3.24 x 10 <sup>-2</sup> |
| 231 | cg18392482 | AMDHD1    | 12 | 94862142  | + | -2.86 ( 0.59 ) | 1.49 x 10 <sup>-6</sup> | 3.42 x 10 <sup>-2</sup> |
| 232 | cg08510456 | BSN       | 3  | 49566012  | + | -2.38 ( 0.49 ) | 1.54 x 10 <sup>-6</sup> | 3.54 x 10 <sup>-2</sup> |
| 233 | cg11024597 | ECRG4     | 2  | 106047843 | + | -2.30 ( 0.47 ) | 1.59 x 10 <sup>-6</sup> | 3.66 x 10 <sup>-2</sup> |
| 234 | cg10409560 | FLJ23657  | 4  | 76700323  | + | 4.03 ( 0.83 )  | 1.60 x 10 <sup>-6</sup> | 3.67 x 10 <sup>-2</sup> |
| 235 | cg03574571 | CD22      | 19 | 40512021  | + | -2.31 ( 0.47 ) | 1.60 x 10 <sup>-6</sup> | 3.68 x 10 <sup>-2</sup> |
| 236 | cg10636246 | AIM2      | 1  | 157313597 | - | -3.21 ( 0.66 ) | 1.61 x 10 <sup>-6</sup> | 3.68 x 10 <sup>-2</sup> |
| 237 | cg02490034 | MEST      | 7  | 129913072 | + | -2.46 ( 0.51 ) | 1.64 x 10 <sup>-6</sup> | 3.77 x 10 <sup>-2</sup> |

|     |            |         |    |           |   |                |                         |                         |
|-----|------------|---------|----|-----------|---|----------------|-------------------------|-------------------------|
| 238 | cg08223235 | BCL2    | 18 | 59054814  | - | -2.73 ( 0.56 ) | 1.65 x 10 <sup>-6</sup> | 3.79 x 10 <sup>-2</sup> |
| 239 | cg22854223 | CD82    | 11 | 44543081  | + | -3.77 ( 0.78 ) | 1.67 x 10 <sup>-6</sup> | 3.83 x 10 <sup>-2</sup> |
| 240 | cg13765961 | MS4A1   | 11 | 59979814  | + | 3.07 ( 0.63 )  | 1.68 x 10 <sup>-6</sup> | 3.84 x 10 <sup>-2</sup> |
| 241 | cg04655481 | GPR21   | 9  | 124836630 | + | -2.75 ( 0.57 ) | 1.74 x 10 <sup>-6</sup> | 4.00 x 10 <sup>-2</sup> |
| 242 | cg15625636 | GPR65   | 14 | 87542190  | + | 3.40 ( 0.70 )  | 1.76 x 10 <sup>-6</sup> | 4.03 x 10 <sup>-2</sup> |
| 243 | cg24870391 | CCL11   | 17 | 29636788  | + | 5.67 ( 1.17 )  | 1.79 x 10 <sup>-6</sup> | 4.09 x 10 <sup>-2</sup> |
| 244 | cg20720686 | POR     | 7  | 75420817  | + | -2.26 ( 0.47 ) | 1.83 x 10 <sup>-6</sup> | 4.20 x 10 <sup>-2</sup> |
| 245 | cg10236239 | SULT1C2 | 2  | 108360946 | + | -2.88 ( 0.60 ) | 1.83 x 10 <sup>-6</sup> | 4.20 x 10 <sup>-2</sup> |
| 246 | cg16745604 | CASP10  | 2  | 201755704 | + | -2.45 ( 0.51 ) | 1.85 x 10 <sup>-6</sup> | 4.25 x 10 <sup>-2</sup> |
| 247 | cg21846903 | VTN     | 17 | 23721408  | - | -2.57 ( 0.53 ) | 1.87 x 10 <sup>-6</sup> | 4.30 x 10 <sup>-2</sup> |
| 248 | cg17399166 | CD1D    | 1  | 156416419 | + | 4.33 ( 0.90 )  | 1.88 x 10 <sup>-6</sup> | 4.32 x 10 <sup>-2</sup> |
| 249 | cg14088811 | SPI1    | 11 | 47356570  | - | -2.24 ( 0.47 ) | 1.91 x 10 <sup>-6</sup> | 4.38 x 10 <sup>-2</sup> |
| 250 | cg06394229 | LGALS4  | 19 | 43995615  | - | -2.84 ( 0.59 ) | 2.05 x 10 <sup>-6</sup> | 4.70 x 10 <sup>-2</sup> |
| 251 | cg05341878 | RIMS2   | 8  | 104900822 | + | 3.39 ( 0.70 )  | 2.06 x 10 <sup>-6</sup> | 4.73 x 10 <sup>-2</sup> |
| 252 | cg02635407 | SH3TC1  | 4  | 8251449   | + | -2.79 ( 0.58 ) | 2.07 x 10 <sup>-6</sup> | 4.74 x 10 <sup>-2</sup> |
| 253 | cg25149155 | BCL2L2  | 14 | 22845617  | + | -3.68 ( 0.77 ) | 2.08 x 10 <sup>-6</sup> | 4.76 x 10 <sup>-2</sup> |
| 254 | cg10126923 | NKG7    | 19 | 56567263  | - | -2.01 ( 0.42 ) | 2.10 x 10 <sup>-6</sup> | 4.82 x 10 <sup>-2</sup> |
| 255 | cg07300408 | RNASE11 | 14 | 20128200  | - | -3.61 ( 0.75 ) | 2.10 x 10 <sup>-6</sup> | 4.82 x 10 <sup>-2</sup> |
| 256 | cg16692277 | GUCY1B2 | 13 | 50538949  | - | -4.22 ( 0.88 ) | 2.17 x 10 <sup>-6</sup> | 4.96 x 10 <sup>-2</sup> |
| 257 | cg17141902 | NINJ1   | 9  | 94937037  | - | 4.60 ( 0.96 )  | 2.18 x 10 <sup>-6</sup> | 4.99 x 10 <sup>-2</sup> |

\*: Chromosomal location is based on NCBI build 36.1.
